# Supplementary material
Source: PubMed Central journal article supplement (PMC5603312)
Supplement: NIHMS774121-supplement-01.pdf [file NIHMS774121-supplement-01.pdf]

## Appendix: Supplemental Tables

*Supplemental Table 1: Odds Ratios from Logistic Regression Analyses Predicting Reading and Mathematics Difficulties (Lowest 15%), ECLS-K: 2011 Data, Spring of First Grade*

|                                                             | Reading Difficulties |         | Mathematics Difficulties |         |
|-------------------------------------------------------------|----------------------|---------|--------------------------|---------|
|                                                             | Model 1              | Model 2 | Model 1                  | Model 2 |
| <b>Executive Functioning Deficits (Spring Kindergarten)</b> |                      |         |                          |         |
| Working memory deficits                                     | 2.28 *               | 1.91 *  | 2.88 *                   | 2.49 *  |
| Cognitive flexibility deficits                              | 1.24 +               | 1.16    | 1.58 *                   | 1.51 *  |
| <b>Prior Learning Difficulties (Spring Kindergarten)</b>    |                      |         |                          |         |
| Reading difficulties                                        | 10.13 *              | 8.25 *  | 3.25 *                   | 2.68 *  |
| Mathematics difficulties                                    | 3.56 *               | 2.93 *  | 10.73 *                  | 8.63 *  |
| <b>Socio-demographics</b>                                   |                      |         |                          |         |
| Male                                                        |                      | 1.3 *   |                          | 0.92    |
| Black                                                       |                      | 0.91    |                          | 1.37 *  |
| Hispanic                                                    |                      | 1.3 *   |                          | 1.03    |
| Asian                                                       |                      | 0.71 *  |                          | 0.61 *  |
| Other race                                                  |                      | 1.14    |                          | 1.06    |
| Family SES                                                  |                      | 0.82 *  |                          | 0.82 *  |
| Poverty                                                     |                      | 1.17 *  |                          | 1.04    |
| Age in fall kindergarten                                    |                      | 1.09 *  |                          | 1       |
| <b>Prior Behavioral Functioning (Spring Kindergarten)</b>   |                      |         |                          |         |
| Behavioral self-regulation                                  |                      | 0.65 *  |                          | 0.63 *  |
| Externalizing problem behaviors                             |                      | 0.96    |                          | 0.92 *  |
| Internalizing problem behaviors                             |                      | 1.07 *  |                          | 1.03    |
| <b>Governmental Assistance, Childcare</b>                   |                      |         |                          |         |
| Food stamps (12 months), Spring Kindergarten                |                      | 1.07    |                          | 1.02    |
| WIC when pregnant                                           |                      | 1.08    |                          | 1.09    |
| WIC as an infant or toddler                                 |                      | 1.09    |                          | 1.02    |
| Regular center care program                                 |                      | 0.94    |                          | 0.98    |
| Temporary assistance                                        |                      | 1.10    |                          | 1.09    |

*Note:* Executive functioning deficit, learning difficulties defined as scoring in the lowest 15% of the respective measure's distribution; WIC= Special Supplemental Nutrition Assistance Program for Women, Infants, and Children. All continuous variables have been standardized with  $M = 0$ ,  $SD = 1$ . \* $p < .05$ , \*\* $p < .01$ , \*\*\* $p < .001$ .

*Supplemental Table 2: Odds Ratios from Logistic Regression Analyses Predicting Reading and Mathematics Difficulties (Lowest 25%), ECLS-K: 2011 Data, Spring of First Grade*

|                                                             | <i>Reading difficulties</i> |                | <i>Mathematics difficulties</i> |                |
|-------------------------------------------------------------|-----------------------------|----------------|---------------------------------|----------------|
|                                                             | <i>Model 1</i>              | <i>Model 2</i> | <i>Model 1</i>                  | <i>Model 2</i> |
| <b>Executive Functioning Deficits (Spring Kindergarten)</b> |                             |                |                                 |                |
| Working memory deficits                                     | 1.98 *                      | 1.73 *         | 2.49 *                          | 2.2 *          |
| Cognitive flexibility deficits                              | 1.18 *                      | 1.11 +         | 1.47 *                          | 1.39 *         |
| <b>Prior Learning Difficulties (Spring Kindergarten)</b>    |                             |                |                                 |                |
| Reading difficulties                                        | 8.75 *                      | 7.53 *         | 2.94 *                          | 2.43 *         |
| Mathematics difficulties                                    | 2.74 *                      | 2.27 *         | 9.69 *                          | 7.88 *         |
| <b>Socio-demographics</b>                                   |                             |                |                                 |                |
| Male                                                        |                             | 1.23 *         |                                 | 0.81 *         |
| Black                                                       |                             | 0.87           |                                 | 1.57 *         |
| Hispanic                                                    |                             | 1.15 +         |                                 | 1.21 *         |
| Asian                                                       |                             | 0.58 *         |                                 | 0.73 *         |
| Other race                                                  |                             | 1.01           |                                 | 1.28 *         |
| Family SES                                                  |                             | 0.82 *         |                                 | 0.8 *          |
| Poverty                                                     |                             | 1.21 *         |                                 | 1.11           |
| Age in fall kindergarten                                    |                             | 1.11 *         |                                 | 0.98           |
| <b>Prior Behavioral Difficulties (Spring Kindergarten)</b>  |                             |                |                                 |                |
| Behavioral self-regulation                                  |                             | 0.69 *         |                                 | 0.68 *         |
| Externalizing problem behaviors                             |                             | 0.99           |                                 | 0.93 *         |
| Internalizing problem behaviors                             |                             | 1.04           |                                 | 1.05           |
| <b>Governmental Assistance, Childcare</b>                   |                             |                |                                 |                |
| Food stamps (12 months), spring Kindergarten                |                             | 1.01           |                                 | 1.03           |
| WIC when pregnant                                           |                             | 1.10           |                                 | 1.01           |
| WIC as an infant or toddler                                 |                             | 1.06           |                                 | 1.08           |
| Regular center care program                                 |                             | 0.91           |                                 | 1.00           |
| Temporary assistance                                        |                             | 1.03           |                                 | 1.05           |

*Note:* Executive functioning deficit, learning difficulties defined as scoring in the lowest 25% of the respective measure's distribution; WIC= Special Supplemental Nutrition Assistance Program for Women, Infants, and Children. All continuous variables have been standardized with  $M = 0$ ,  $SD = 1$ . +  $p \leq .1$ ; \*  $p \leq .05$ , \*\*  $p \leq .01$ , \*\*\*  $p \leq .001$ .

Supplemental Table 3. OLS Regression, Executive Function and Reading and Mathematics Achievement (Continuous Variables), ECLS-K: 2011 Data

|                                                           | Reading Test IRT Score, First Grade |         | Mathematics Test IRT Score, First Grade |         |
|-----------------------------------------------------------|-------------------------------------|---------|-----------------------------------------|---------|
|                                                           | Model 1                             | Model 2 | Model 1                                 | Model 2 |
| <b>Executive Function (Spring Kindergarten)</b>           |                                     |         |                                         |         |
| Working memory                                            | 0.09 *                              | 0.07 *  | 0.08 *                                  | 0.07 *  |
| Cognitive flexibility                                     | 0.02 *                              | 0.01 *  | 0.04 *                                  | 0.04 *  |
| <b>Prior Academic Achievement (Spring Kindergarten)</b>   |                                     |         |                                         |         |
| Reading achievement                                       | 0.59 *                              | 0.55 *  | 0.08 *                                  | 0.07 *  |
| Mathematics achievement                                   | 0.2 *                               | 0.18 *  | 0.7 *                                   | 0.66 *  |
| <b>Socio-demographics</b>                                 |                                     |         |                                         |         |
| Male                                                      |                                     | -0.07 * |                                         | 0.09 *  |
| Black                                                     |                                     | -0.01   |                                         | -0.16 * |
| Hispanic                                                  |                                     | -0.06 * |                                         | -0.09 * |
| Asian                                                     |                                     | 0       |                                         | 0       |
| Other race                                                |                                     | -0.01   |                                         | -0.06 * |
| Family SES                                                |                                     | 0.02 *  |                                         | 0.02 *  |
| Poverty                                                   |                                     | -0.05 * |                                         | -0.02   |
| Age in fall kindergarten                                  |                                     | -0.04 * |                                         | -0.02 * |
| <b>Prior Behavioral Functioning (Spring Kindergarten)</b> |                                     |         |                                         |         |
| Behavioral self-regulation                                |                                     | 0.08 *  |                                         | 0.07 *  |
| Externalizing problem behaviors                           |                                     | 0.01    |                                         | 0.02 *  |
| Internalizing problem behaviors                           |                                     | -0.01 * |                                         | 0       |
| <b>Governmental Assistance, Childcare</b>                 |                                     |         |                                         |         |
| Food stamps (12 months), Spring Kindergarten              |                                     | -0.02   |                                         | 0.00    |
| WIC when pregnant                                         |                                     | -0.02   |                                         | -0.02   |
| WIC as an infant or toddler                               |                                     | 0.00    |                                         | -0.01   |
| Regular center care program                               |                                     | 0.01    |                                         | 0.00    |
| Temporary assistance                                      |                                     | 0.01    |                                         | -0.03   |
| $R^2$                                                     | 0.64                                | 0.65    | 0.69                                    | 0.70    |
| Adjusted $R^2$                                            | 0.64                                | 0.65    | 0.69                                    | 0.70    |

Note: WIC= Special Supplemental Nutrition Assistance Program for Women, Infants, and Children. All continuous variables have been standardized with  $M = 0$ ,  $SD = 1$ . \* $p < .05$ , \*\* $p < .01$ , \*\*\* $p < .001$ .

Supplemental Table 4. Dominance Analysis Using Nagelkerke's Pseudo  $R^2$  with 15% Cutoff

| <i>Criterion Variables</i> |                          | <i>Subset Model</i>                                        | <i>Pseudo R<sup>2</sup></i> | <i>Additional Contribution</i> |                                      |
|----------------------------|--------------------------|------------------------------------------------------------|-----------------------------|--------------------------------|--------------------------------------|
|                            |                          |                                                            |                             | <i>Working Memory Deficit</i>  | <i>Cognitive Flexibility Deficit</i> |
| Model 1                    | Reading difficulties     | All other predictors except deficits in executive function | 0.418                       | 0.016                          | 0.001                                |
|                            | Mathematics difficulties | All other predictors except deficits in executive function | 0.449                       | 0.022                          | 0.004                                |
| Model 2                    | Reading difficulties     | All other predictors except deficits in executive function | 0.461                       | 0.009                          | 0.001                                |
|                            | Mathematics difficulties | All other predictors except deficits in executive function | 0.483                       | 0.016                          | 0.003                                |

*Supplemental Table 5. Dominance Analysis Using Nagelkerke's Pseudo R<sup>2</sup> with 25% Cutoff*

| <i>Criterion Variables</i> |                          | <i>Subset Model</i>                                        | <i>Pseudo R<sup>2</sup></i> | <i>Additional Contribution</i> |                                      |
|----------------------------|--------------------------|------------------------------------------------------------|-----------------------------|--------------------------------|--------------------------------------|
|                            |                          |                                                            |                             | <i>Working Memory Deficit</i>  | <i>Cognitive Flexibility Deficit</i> |
| Model 1                    | Reading difficulties     | All other predictors except deficits in executive function | 0.415                       | 0.012                          | 0.001                                |
|                            | Mathematics difficulties | All other predictors except deficits in executive function | 0.449                       | 0.022                          | 0.004                                |
| Model 2                    | Reading difficulties     | All other predictors except deficits in executive function | 0.457                       | 0.007                          | 0.001                                |
|                            | Mathematics difficulties | All other predictors except deficits in executive function | 0.497                       | 0.013                          | 0.003                                |

Supplemental Table 6. Dominance Analysis for Regression Analysis Using Pseudo R<sup>2</sup> with Continuous Variables

|         | Criterion Variables      | Subset Model                                               | Pseudo R <sup>2</sup> | Additional Contribution |                               |
|---------|--------------------------|------------------------------------------------------------|-----------------------|-------------------------|-------------------------------|
|         |                          |                                                            |                       | Working Memory Deficit  | Cognitive Flexibility Deficit |
| Model 1 | Reading difficulties     | All other predictors except deficits in executive function | 0.634                 | 0.006                   | 0.001                         |
|         | Mathematics difficulties | All other predictors except deficits in executive function | 0.681                 | 0.005                   | 0.002                         |
| Model 2 | Reading difficulties     | All other predictors except deficits in executive function | 0.649                 | 0.004                   | 0.000                         |
|         | Mathematics difficulties | All other predictors except deficits in executive function | 0.693                 | 0.004                   | 0.002                         |

Supplemental Table 7. Correlations Between Children's Continuous Working Memory and Cognitive Flexibility and Reading And Mathematics Achievement, ECLS-K: 2011 Data, Spring of Kindergarten.

|                            | 1.      | 2.      | 3.      |
|----------------------------|---------|---------|---------|
| 1. Working memory          |         |         |         |
| 2. Cognitive flexibility   | 0.30*** |         |         |
| 3. Reading achievement     | 0.51*** | 0.29*** |         |
| 4. Mathematics achievement | 0.59*** | 0.37*** | 0.71*** |

Note: \*\*\*p<.001
